# Supplementary material for: Impact of BRCA1/2 status on young women’s sexual function, relationships, and reproduction after predictive genetic testing
Source: Research Square preprint supplement (doi:10.21203/rs.3.rs-6774023/v1), 2025-07-14
Supplement: Supplementary file 1 [file 837683f4ae1b54fc621bd452.pdf]

**Table S1. Factors associated with partnering**

|                                           |                      | <b>Relationship status (partnered)</b> |                |
|-------------------------------------------|----------------------|----------------------------------------|----------------|
|                                           | Category             | <b>Odds ratio (95% CI)</b>             | <b>p-value</b> |
| <b>BRCA1/2 status</b>                     | <i>BRCA</i> negative | Reference                              | 0.375          |
|                                           | <i>BRCA</i> positive | 1.20 (0.80, 1.78)                      |                |
| <b>Time since genetic testing (years)</b> | Continuous           | 1.01 (0.95, 1.07)                      | 0.711          |
| <b>Age (years)</b>                        | Continuous           | 1.07 (1.03, 1.11)                      | <0.001         |
| <b>SEIFA</b>                              | Continuous           | 1.00 (0.93, 1.07)                      | 0.943          |
| <b>Education</b>                          | Not tertiary         | Reference                              | 0.667          |
|                                           | Tertiary             | 0.91 (0.61, 1.38)                      |                |

\*Multivariate logistic regression for relationship status outcome.
